# Supplementary material
Source: PubMed Central journal article supplement (PMC2967366)
Supplement: NIHMS244616-supplement-01.pdf [file NIHMS244616-supplement-01.pdf]

Supplemental Table 1  
Immunophenotype at Baseline, by Study

|      |               | S0112<br>N=60 | S0301: original<br>eligibility criteria<br>N=14 | S0301: revised<br>eligibility criteria<br>N=50 |
|------|---------------|---------------|-------------------------------------------------|------------------------------------------------|
| CD13 | Negative      | 1 (2%)        | 0                                               | 1 (2%)                                         |
|      | Weak Positive | 13 (26%)      | 1 (8%)                                          | 23 (47%)                                       |
|      | Positive      | 36 (72%)      | 11 (92%)                                        | 25 (51%)                                       |
|      | Not Done      | 0             | 2                                               | 1                                              |
| CD33 | Negative      | 1 (2%)        | 0                                               | 1 (2%)                                         |
|      | Weak Positive | 22 (45%)      | 11 (79%)                                        | 28 (61%)                                       |
|      | Positive      | 26 (53%)      | 3 (21%)                                         | 17 (37%)                                       |
|      | Not Done      | 1             | 0                                               | 4                                              |
| CD34 | Negative      | 10 (20%)      | 3 (21%)                                         | 23 (46%)                                       |
|      | Weak Positive | 10 (20%)      | 2 (14%)                                         | 11 (22%)                                       |
|      | Positive      | 30 (60%)      | 9 (64%)                                         | 16 (32%)                                       |
| CD45 | Negative      | 0 (0%)        | 0 (0%)                                          | 0 (0%)                                         |
|      | Weak Positive | 6 (12%)       | 1 (7%)                                          | 2 (4%)                                         |
|      | Positive      | 44 (88%)      | 13 (93%)                                        | 45 (96%)                                       |
|      | Not Done      | 0             | 0                                               | 3                                              |

Supplemental Table 2  
Effects of Immunophenotype on Response to Induction Chemotherapy, by Study

|      |                    | Study S0112 |                   |                   | Study S0301: revised eligibility criteria |                   |                   |
|------|--------------------|-------------|-------------------|-------------------|-------------------------------------------|-------------------|-------------------|
|      |                    | Patients    | Complete Response | Resistant Disease | Patients                                  | Complete Response | Resistant Disease |
| CD13 | Negative           | 1           | 0 (0%)            | 1 (100%)          | 1                                         | 1 (100%)          | 0 (0%)            |
|      | Weak Positive      | 13          | 6 (46%)           | 2 (15%)           | 23                                        | 10 (43%)          | 5 (22%)           |
|      | Positive           | 36          | 13 (36%)          | 13 (36%)          | 25                                        | 11 (44%)          | 7 (28%)           |
|      | Not Done           | 0           | ---               | ---               | 1                                         | 0 (0%)            | 1 (100%)          |
|      | Trend <sup>a</sup> |             | P = 0.66          | P = 0.32          |                                           | P = 0.90          | P = 0.56          |
| CD33 | Negative           | 1           | 0 (0%)            | 1 (100%)          | 1                                         | 1 (100%)          | 0 (0%)            |
|      | Weak Positive      | 22          | 7 (32%)           | 8 (36%)           | 28                                        | 12 (43%)          | 6 (21%)           |
|      | Positive           | 26          | 12 (46%)          | 7 (27%)           | 17                                        | 9 (53%)           | 4 (24%)           |
|      | Not Done           | 1           | 0 (0%)            | 0 (0%)            | 4                                         | 0 (0%)            | 3 (75%)           |
|      | Trend <sup>a</sup> |             | P = 0.26          | P = 0.36          |                                           | P = 0.59          | P = 0.82          |
| CD34 | Negative           | 10          | 6 (60%)           | 3 (30%)           | 23                                        | 12 (52%)          | 6 (26%)           |
|      | Weak Positive      | 10          | 5 (50%)           | 5 (50%)           | 11                                        | 4 (36%)           | 2 (18%)           |
|      | Positive           | 30          | 8 (27%)           | 8 (27%)           | 16                                        | 6 (38%)           | 5 (31%)           |
|      | Trend <sup>a</sup> |             | P = 0.043         | P = 0.32          |                                           | P = 0.53          | P = 0.56          |
| CD45 | Negative           | 0           | ---               | ---               | 0                                         | ---               | ---               |
|      | Weak Positive      | 6           | 2 (33%)           | 1 (17%)           | 2                                         | 2 (100%)          | 0 (0%)            |
|      | Positive           | 44          | 17 (39%)          | 15 (34%)          | 45                                        | 20 (44%)          | 11 (24%)          |
|      | Not Done           | 0           | ---               | ---               | 3                                         | 0 (0%)            | 2 (67%)           |
|      | Trend <sup>a</sup> |             | P = 0.80          | P = 0.39          |                                           | P = 0.12          | P = 0.42          |

<sup>a</sup> Two-sided p-value based on the  $\chi^2$  approximation to the Fisher's exact test, testing positive versus negative or weak positive, and excluding patients with assay not done.

Supplemental Table 3  
Effects of Demographic and Disease Characteristics at Baseline on Response to Induction  
Chemotherapy, by Study

|                                 |                           | Study S0112 |                   |                   | Study S0301: revised eligibility criteria |                   |                   |
|---------------------------------|---------------------------|-------------|-------------------|-------------------|-------------------------------------------|-------------------|-------------------|
|                                 |                           | Patients    | Complete Response | Resistant Disease | Patients                                  | Complete Response | Resistant Disease |
| Performance Status              | 0                         | 20          | 19 (65%)          | 5 (25%)           | 18                                        | 8 (44%)           | 6 (33%)           |
|                                 | 1                         | 25          | 9 (36%)           | 6 (24%)           | 28                                        | 12 (43%)          | 6 (21%)           |
|                                 | 2                         | 11          | 1 (9%)            | 6 (55%)           | 4                                         | 2 (50%)           | 1 (25%)           |
|                                 | 3                         | 4           | 0 (0%)            | 2 (50%)           | 0                                         | ---               | ---               |
|                                 | Trend <sup>a</sup>        |             | P = 0.003         | P = 0.43          |                                           | P = 0.96          | P = 0.38          |
| AML Onset                       | De novo                   | 44          | 22 (50%)          | 12 (27%)          | 42                                        | 19 (45%)          | 11 (26%)          |
|                                 | MDS-related               | 14          | 0 (0%)            | 6 (43%)           | 7                                         | 2 (29%)           | 2 (29%)           |
|                                 | Treatment-related         | 2           | 1 (50%)           | 1 (50%)           | 0                                         | ---               | ---               |
|                                 | Unknown                   | 0           | ---               | ---               | 1                                         | 1 (100%)          | 0 (0%)            |
|                                 | Trend <sup>b</sup>        |             | P = 0.002         | P = 0.23          |                                           | P = 0.41          | P = 0.89          |
| Cytogenetic Risk Classification | Evaluable                 | 51          | ---               | ---               | 31                                        | ---               | ---               |
|                                 | Unfavorable <sup>c</sup>  | 19          | 7 (37%)           | 6 (32%)           | 12                                        | 5 (42%)           | 5 (42%)           |
|                                 | Intermediate <sup>c</sup> | 29          | 11 (38%)          | 9 (31%)           | 16                                        | 10 (63%)          | 2 (13%)           |
|                                 | - Normal <sup>c</sup>     | 25          | 11 (44%)          | 7 (28%)           | 11                                        | 7 (64%)           | 1 (9%)            |
|                                 | Favorable <sup>c</sup>    | 3           | 3 (100%)          | 0 (0%)            | 3                                         | 1 (33%)           | 0 (0%)            |
|                                 | Trend <sup>d</sup>        |             | P = 0.87          | P = 0.99          |                                           | P = 0.85          | P = 0.16          |
| WBC (1000/mcL)                  | ≤ 4.0                     | 23          | 10 (43%)          | 6 (26%)           | 16                                        | 7 (44%)           | 7 (44%)           |
|                                 | 4.01 – 20.0               | 21          | 8 (38%)           | 7 (33%)           | 15                                        | 8 (53%)           | 3 (20%)           |
|                                 | > 20.0                    | 16          | 5 (31%)           | 6 (38%)           | 19                                        | 7 (37%)           | 3 (16%)           |
|                                 | Trend <sup>e</sup>        |             | P = 0.89          | P = 0.42          |                                           | P = 0.79          | P = 0.078         |

<sup>a</sup> Two-sided p-value based on the  $\chi^2$  approximation to the Fisher's exact test, testing performance status of 0 versus >0.

<sup>b</sup> Two-sided p-value based on the  $\chi^2$  approximation to the Fisher's exact test, testing de novo versus MDS- or treatment-related AML, excluding unknown AML onset.

<sup>c</sup> Percentages based on number with evaluable cytogenetics.

<sup>d</sup> Two-sided p-value based on the  $\chi^2$  approximation to the Fisher's exact test, testing unfavorable versus favorable or intermediate, excluding patients without evaluable cytogenetics.

<sup>e</sup> Two-sided p-value based on logistic regression treating WBC as a continuous covariate.
